# Supplementary material for: Effects of soft rock on soil properties and bacterial community in Mu Us Sandy Land, China
Source: PeerJ. 2022 Jun 21;10:e13561. doi: 10.7717/peerj.13561 (PMC9231347; doi:10.7717/peerj.13561)
Supplement: Supplemental Information 1 [file peerj-10-13561-s001.xlsx]

## Sheet: Physical and chemical propertie
Proportion	pH			mean			Proportion	AP（mg/kg）			mean
1：1	8.455	8.55	8.66	8.56±1.22 aA			1：1	17.7274	14.56	12.23	14.84±3.55 aA
	9.02	8.95	9	8.99±2.01 aA				4.73874	5.56	4.12	4.81±1.32 bA
	8.88	8.15	9.31	8.78±0.89 aA				6.38318	6.98	5.99	6.45±1.23 bA
1：2	8.88	9.44	8.29	8.87±1.74 aA			1：2	5.53085	5.55	5.5	5.53±1.52 aC
	9.105	9	9.23	9.11±1.99 aA				2.97387	3.01	2.89	2.96±0.39 bA
	8.9	9.6	8.2	8.90±0.56 aA				3.60385	3.68	3.59	3.62±0.58 bBC
1：5	8.77	8.55	9.01	8.78±0.91 aA			1：5	7.58292	7.89	7.25	7.57±2.14 aB
	8.99	8.52	9.37	8.96±1.30 aA				3.04336	3	3.01	3.02±0.50 bA
	8.93	8.22	9.67	8.94±2.16 aA				2.80656	2	2.78	2.53±0.33 bC
0：1	8.915	8	9.74	8.89±2.11 aA			0：1	4.08426	4.01	3.45	3.85±0.87 aC
	9.075	9.18	9	9.09±2.41 aA				3.74827	3.44	3.94	3.71±0.69 aA
	9.01	8.85	9.17	9.01±1.95 aA				4.34242	5.02	4.37	4.58±0.57 aAB
Proportion	TN(g/kg）			mean			Proportion	AK(mg/kg)			mean
1：1	0.277548	0.22	0.31	0.27±0.07 aAB			1：1	76.939	75	64.4	72.11±5.61 aA
	0.110981	0.15	0.12	0.13±0.02 bB				26.081	30.2	24.8	27.03±2.33 cBC
	0.0869208	0.13	0.11	0.11±0.03 bA				34.8537	30.2	38.55	34.53±4.33 bAB
1：2	0.237595	0.22	0.26	0.24±0.05 aAB			1：2	44.2191	40.32	48.25	44.26±4.56 aC
	0.0945098	0.12	0.06	0.09±0.01 bB				33.4311	36.71	30.13	33.42±5.11 bAB
	0.127343	0.15	0.11	0.13±0.02 abA				33.4311	30.04	35.89	33.12±5.32 bAB
1：5	0.337542	0.52	0.17	0.34±0.06 aA			1：5	62.5944	61.88	65.95	63.47±6.38 aB
	0.275367	0.3	0.25	0.28±0.09 aA				37.936	36.11	38.16	37.40±6.15 bA
	0.140721	0.11	0.17	0.14±0.01 bA				37.936	38.62	37.1	37.89±5.55 bA
0：1	0.172978	0.19	0.12	0.16±0.04 aB			0：1	38.4451	39	38.11	38.52±4.39 aC
	0.149482	0.2	0.11	0.15±0.03 aAB				20.5441	20.31	20.14	20.33±4.16 cC
	0.158609	0.15	0.17	0.16±0.02 aA				29.3586	27.55	28.57	28.49±2.67 bB
Proportion	SOC（g/kg)			mean			Proportion	NH4+-N (mg kg-1)			mean
1：1	2.5693	2.66	2.51	2.58±0.09 aAB			1：1	3.44757	3.55	3.35	3.45±1.02 bA
	3.11021	3.01	3.21	3.11±0.08 aB				3.49872	3.8	3.2	3.50±0.89 bAB
	2.64399	2.81	2.47	2.64±0.13 aA				5.30946	5.51	5.11	5.31±1.14 aA
1：2	2.73079	2.14	3.36	2.74±0.15 bA			1：2	3.44246	3	3.88	3.44±0.88 aA
	4.99625	5.5	4.5	5.00±1.04 aA				3.54476	4	3.08	3.54±1.36 aA
	2.62928	2.22	3.05	2.63±0.06 bA				3.18159	3.2	3.16	3.18±0.58 aC
1：5	2.78952	2.88	2.69	2.79±0.21 abA			1：5	3.76982	3.8	3.74	3.77±1.43 bA
	2.93071	3.4	3.06	3.13±0.35 aB				3.82609	3.8	3.86	3.83±1.11 bA
	2.21568	2	2.44	2.22±0.48 bA				4.62404	4.12	5.12	4.62±0.91 aB
0：1	1.91309	1.52	2.3	1.91±0.47 aB			0：1	2.39	2.42	2.36	2.39±0.42 bB
	2.99	2.21	1.85	2.35±0.39 aB				2.95	3	2.9	2.95±0.56 aB
	2.33438	2	1.74	2.02±0.15 aA				2.43223	2.4	2.46	2.43±0.67 abD
							比例	NO3--N (mg kg-1)			mean
Proportion	Quantity(×109 copies g-1)			mean			1：1	18.6394	18.66	18.62	18.64±2.21 aA
1：1	1.16779	1.06299	1.08043	1.1				9.97954	10	9.97	9.98±2.34 bA
	0.105665	0.111495	0.115414	0.11				7.50639	7.48	7.54	7.51±2.06 cA
	0.201866	0.215341	0.200062	0.21			1：2	17.4425	17	17.88	17.44±4.05 aB
1：2	0.408898	0.446651	0.442999	0.43				8.21483	8.2	8.25	8.22±2.33 bB
	0.0617108	0.0385498	0.0376819	0.05				6.711	6.22	6.91	6.61±2.12 cB
	0.0754616	0.0696724	0.0679956	0.07			1：5	13.0844	13	13.16	13.08±1.96 aC
1：5	0.869932	0.961669	0.975307	0.94				6.99744	6.5	7.5	7.00±1.43 bC
	0.178426	0.197975	0.174902	0.18				5.49105	5.5	5.38	5.46±0.16 cC
	0.0848328	0.175028	0.20685	0.16			0：1	4.24	4.11	4.35	4.23±0.33 bD
0：1	0.38	0.41	0.38	0.39				2.25	2.3	2.2	2.25±0.17 cD
	0.02	0.03	0.04	0.03				4.86957	4.88	4.86	4.87±0.63 aD
	0.05	0.04	0.03	0.04
